# Supplementary material for: The latency of spontaneous eye blinks marks relevant visual and auditory information processing
Source: PubMed Central journal article supplement (PMC8196427; doi:10.1167/jov.21.6.7), 2021-06-11
Supplement: jovi-21-6-7_s013.pdf [file jovi-21-6-7_s013.pdf]

## **Supplementary material**

### **The Latency of Spontaneous Eye Blinks Marks Relevant Visual and Auditory Information Processing**

Supriya Murali<sup>1</sup>, Barbara Händel<sup>1</sup>

<sup>1</sup>Department of Psychology III, University of Würzburg

#### **Section 1: Individual data**

(Figure S1 to Figure S6)

#### **Section 2: Blink latency for each ISI and ON-time, and for each ISI and RT combinations**

(Figure S7 to Figure S9)

#### **Section 3: Reaction time for the different ON-times and reaction times**

(Figure S10 to Figure S11)

#### **ANCOVA results:**

1. For the visual, there is a significant effect of ISI ( $F(1,527) = 26.8, p = .0001$ ) but not ON-time ( $F(2,527) = 2.4, p = .09$ ) and no interaction ( $F(2,527) = 0.92, p = .40$ )

2. For the auditory there is no significant effect of ISI ( $F(1,681) = 1.47, p = .25$ ), but significant effect of ON-time ( $F(2,681) = 5.71, p = .004$ ) and no interaction ( $F(2,681) = 2.8, p = .06$ ).

#### **Section 4: Stimulus timing test results**

(Figure S12)

The results of the test revealed that the mean difference (over the trials) between the experimental input and the actual recording for the visual was 0.0017s (SD = 5.9265e-04s) and the auditory was 1.5364e-04s (SD = 3.1789e-04). Both domains therefore show an temporal accuracy of below 2 ms including stimulus on- and offset.

## Section 5: Blink latency vs reaction time for each subject

**Table S1**

*Results from the individual regressions for blink latency vs response time for the visual condition. Note that two subjects had been excluded (see Methods).*

| <b>Subject number</b> | <b>Beta</b> | <b>R<sup>2</sup></b> | <b>F</b> | <b>p</b>         |
|-----------------------|-------------|----------------------|----------|------------------|
| 1                     | -0.25       | 0.01                 | 1.2      | 0.26             |
| 2                     | -0.37       | 0.01                 | 1.8      | 0.17             |
| 3                     | -           | -                    | -        | -                |
| 4                     | 0.5         | 0.21                 | 18.1     | <b>6.59e-05*</b> |
| 5                     | -0.18       | 0.005                | 0.69     | 0.41             |
| 6                     | -0.75       | 0.06                 | 6.4      | <b>0.01*</b>     |
| 7                     | -0.08       | 0.02                 | 1.25     | 0.26             |
| 8                     | -0.02       | 0.0002               | 0.09     | 0.76             |
| 9                     | 0.05        | 0.004                | 0.57     | 0.45             |
| 10                    | -0.08       | 0.006                | 0.404    | 0.53             |
| 11                    | 0.04        | 9.25e-05             | 0.05     | 0.82             |
| 12                    | 0.5         | 0.07                 | 44.08    | <b>7.3e-11*</b>  |
| 13                    | 0.2         | 0.01                 | 0.46     | 0.5              |
| 14                    | 0.03        | 0.0001               | 0.05     | 0.82             |
| 15                    | 0.02        | 0.0004               | 0.02     | 0.873            |
| 16                    | -           | -                    | -        | -                |
| 17                    | -0.64       | 0.05                 | 2.5      | 0.11             |
| 18                    | 0.09        | 0.01                 | 2.81     | 0.1              |

**Table S2**

*Results from the individual regressions for blink latency vs response time for the auditory condition. Note that one subject had been excluded (see Methods).*

| <b>Subject number</b> | <b>Beta</b> | <b>R<sup>2</sup></b> | <b>F</b> | <b>p</b>      |
|-----------------------|-------------|----------------------|----------|---------------|
| 1                     | 0.57        | 0.1                  | 12.3     | <b>0.001*</b> |
| 2                     | -0.2        | 0.001                | 0.13     | 0.71          |
| 3                     | -0.92       | 0.1                  | 3.5      | 0.07          |
| 4                     | 0.46        | 0.04                 | 1.9      | 0.17          |
| 5                     | -0.07       | 0.03                 | 3.14     | 0.08          |
| 6                     | -0.81       | 0.1                  | 3.7      | 0.06          |
| 7                     | -0.56       | 0.04                 | 2.1      | 0.1           |
| 8                     | --          | -                    | -        | -             |
| 9                     | -0.07       | 0.004                | 0.1      | 0.74          |
| 10                    | -0.15       | 0.01                 | 0.76     | 0.38          |
| 11                    | -0.16       | 0.01                 | 1.87     | 0.17          |
| 12                    | 0.07        | 0.0002               | 0.07     | 0.77          |
| 13                    | -0.53       | 0.08                 | 2.12     | 0.15          |
| 14                    | 0.09        | 0.003                | 0.91     | 0.34          |
| 15                    | 0.13        | 0.005                | 0.34     | 0.55          |
| 16                    | 0.15        | 0.01                 | 3.5      | 0.06          |
| 17                    | -0.005      | 1.5e-05              | 0.001    | 0.97          |
| 18                    | 0.22        | 0.02                 | 3.22     | 0.07          |
